# Supplementary material for: A selective eradication of human nonhereditary breast cancer cells by phenanthridine-derived polyADP-ribose polymerase inhibitors
Source: PubMed Central journal article supplement (PMC2815540; doi:10.1186/bcr2445), 2009-11-09

A documented experiment, testing PJ-34 treatment  
in nude mice injected with MDA231 cells

Slides 3-7: Mice treated with PJ-34, dripping from sub-cutan  
Implanted osmotic pump (•). Pumps were implanted 24  
hours before injection with MDA231 cells.

Slide 8: untreated and un-injected mice (Control).

Slides 9-13: Mice untreated with PJ-34 developed tumors  
10 days after injection with MDA231 cells

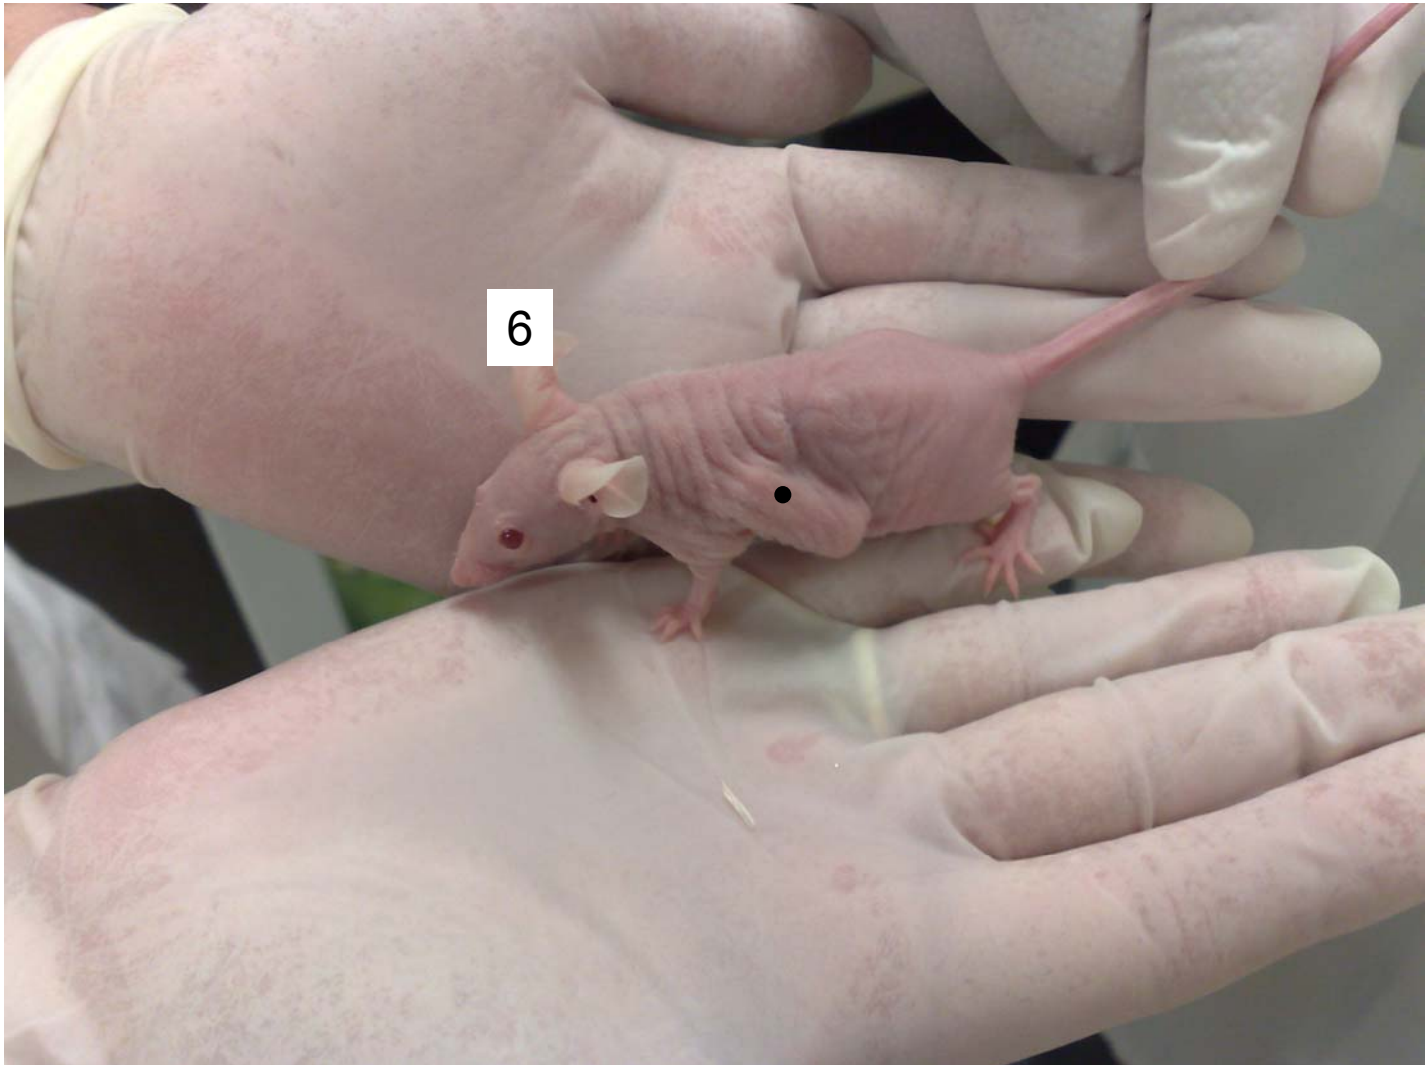

7

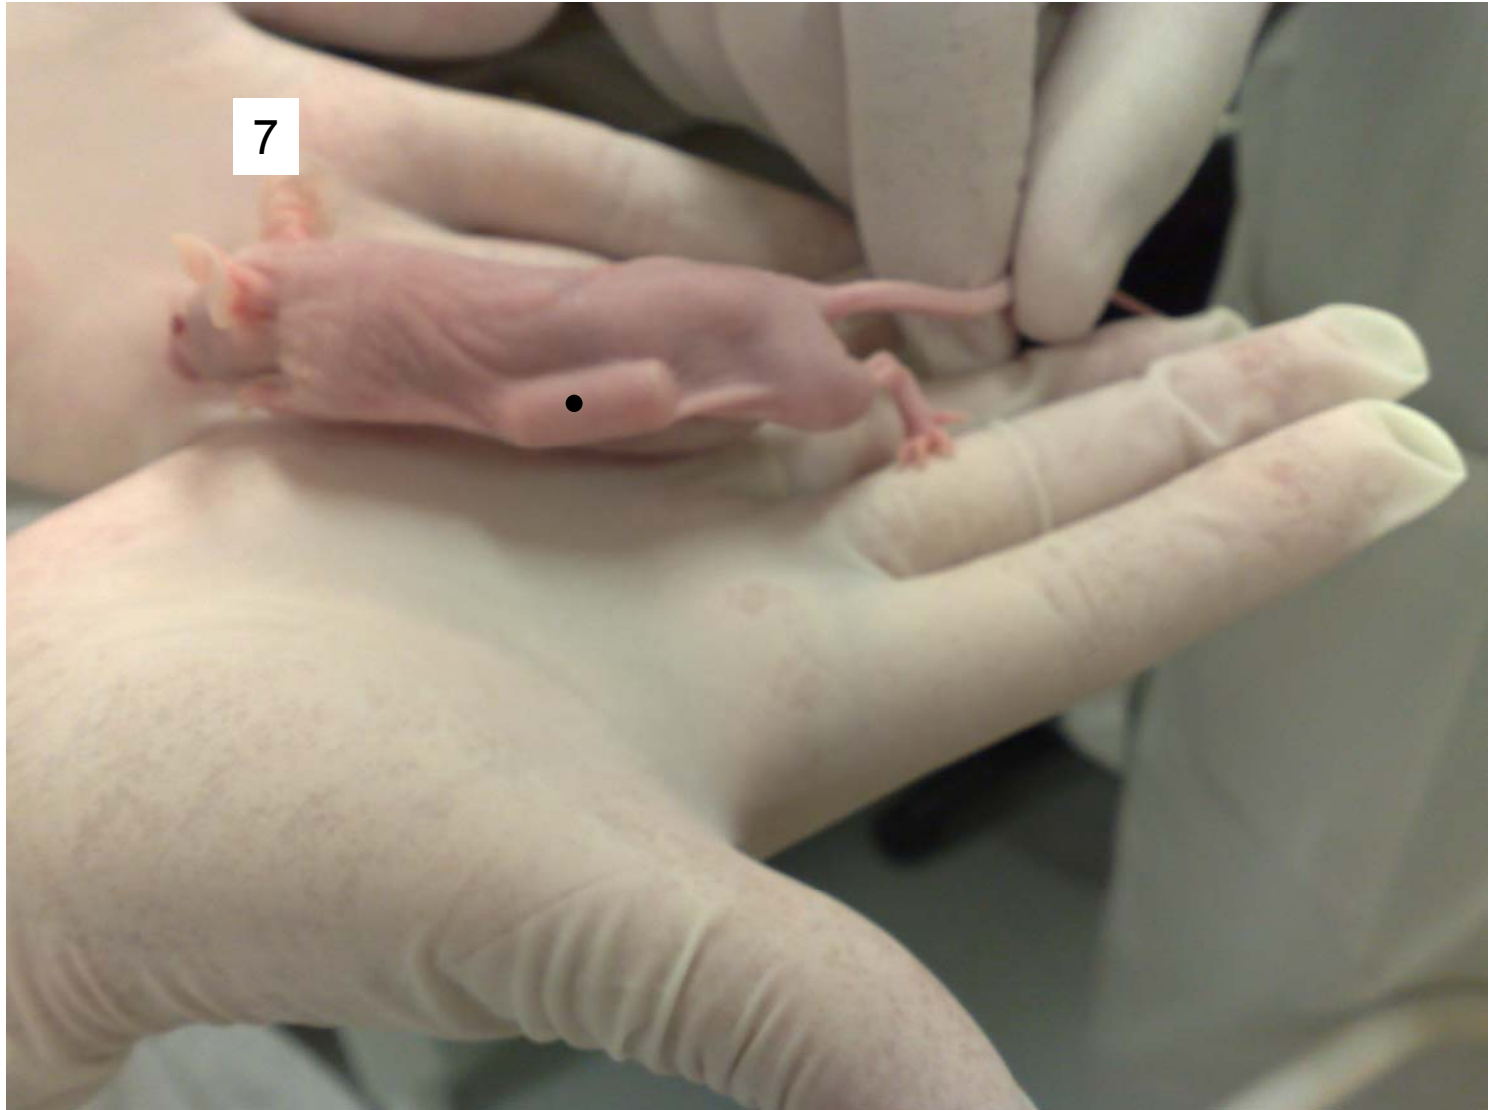

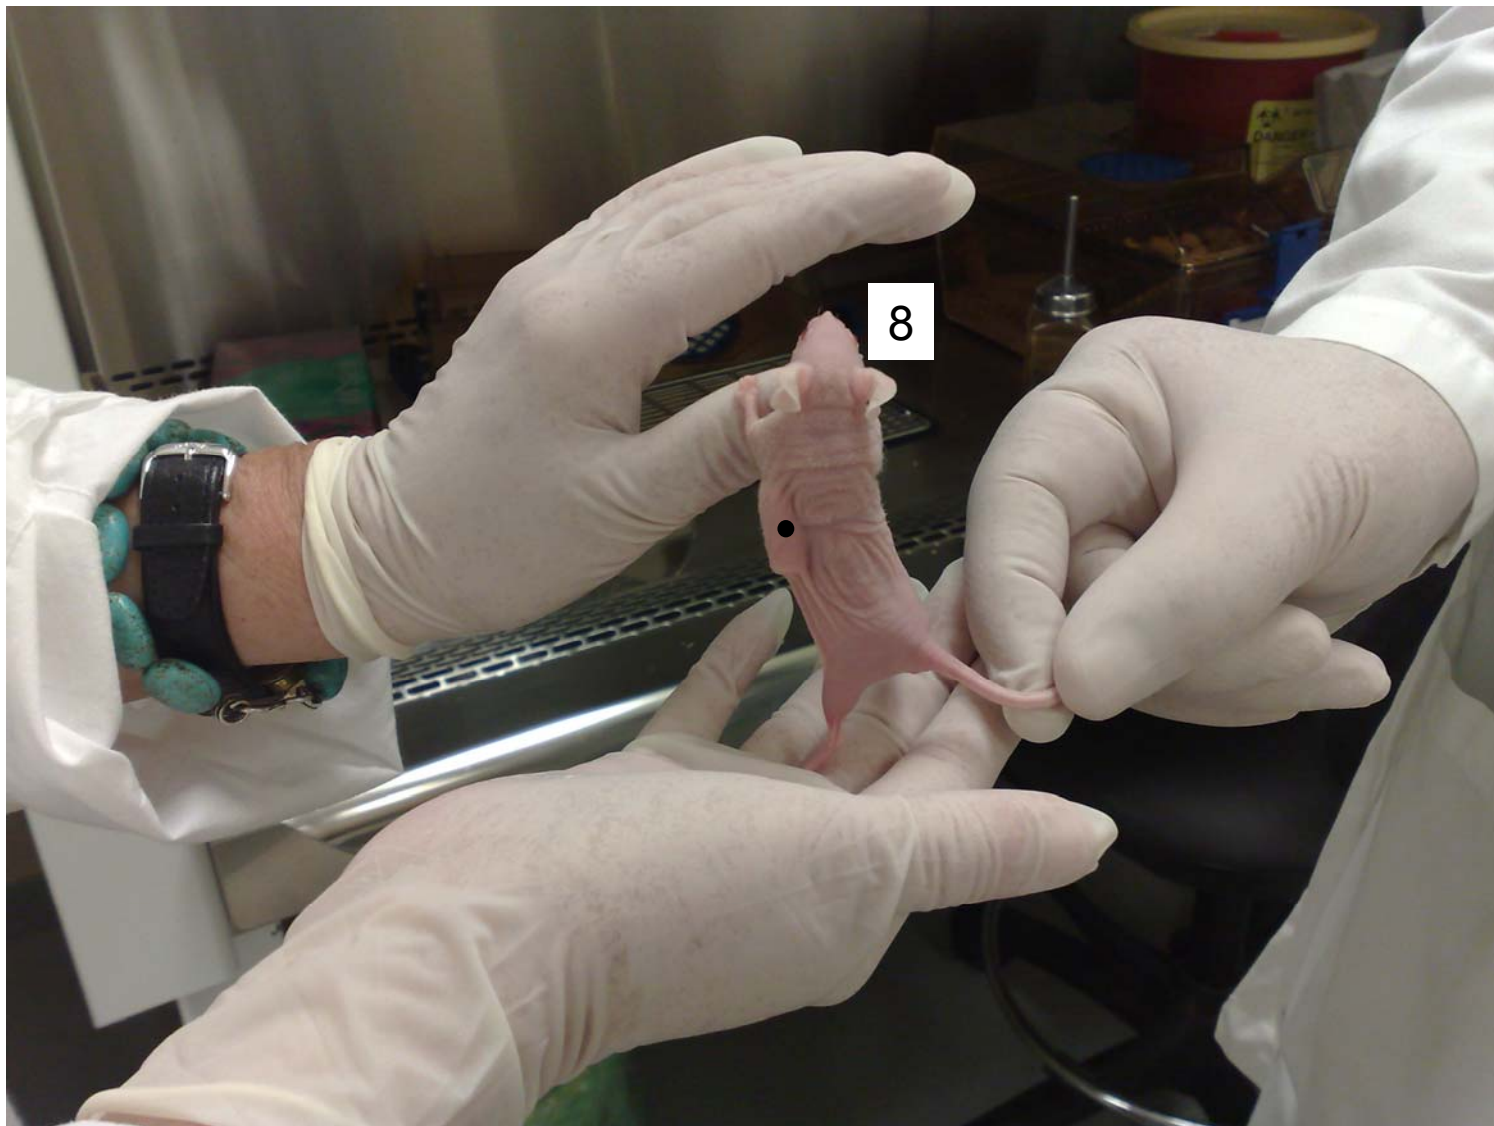

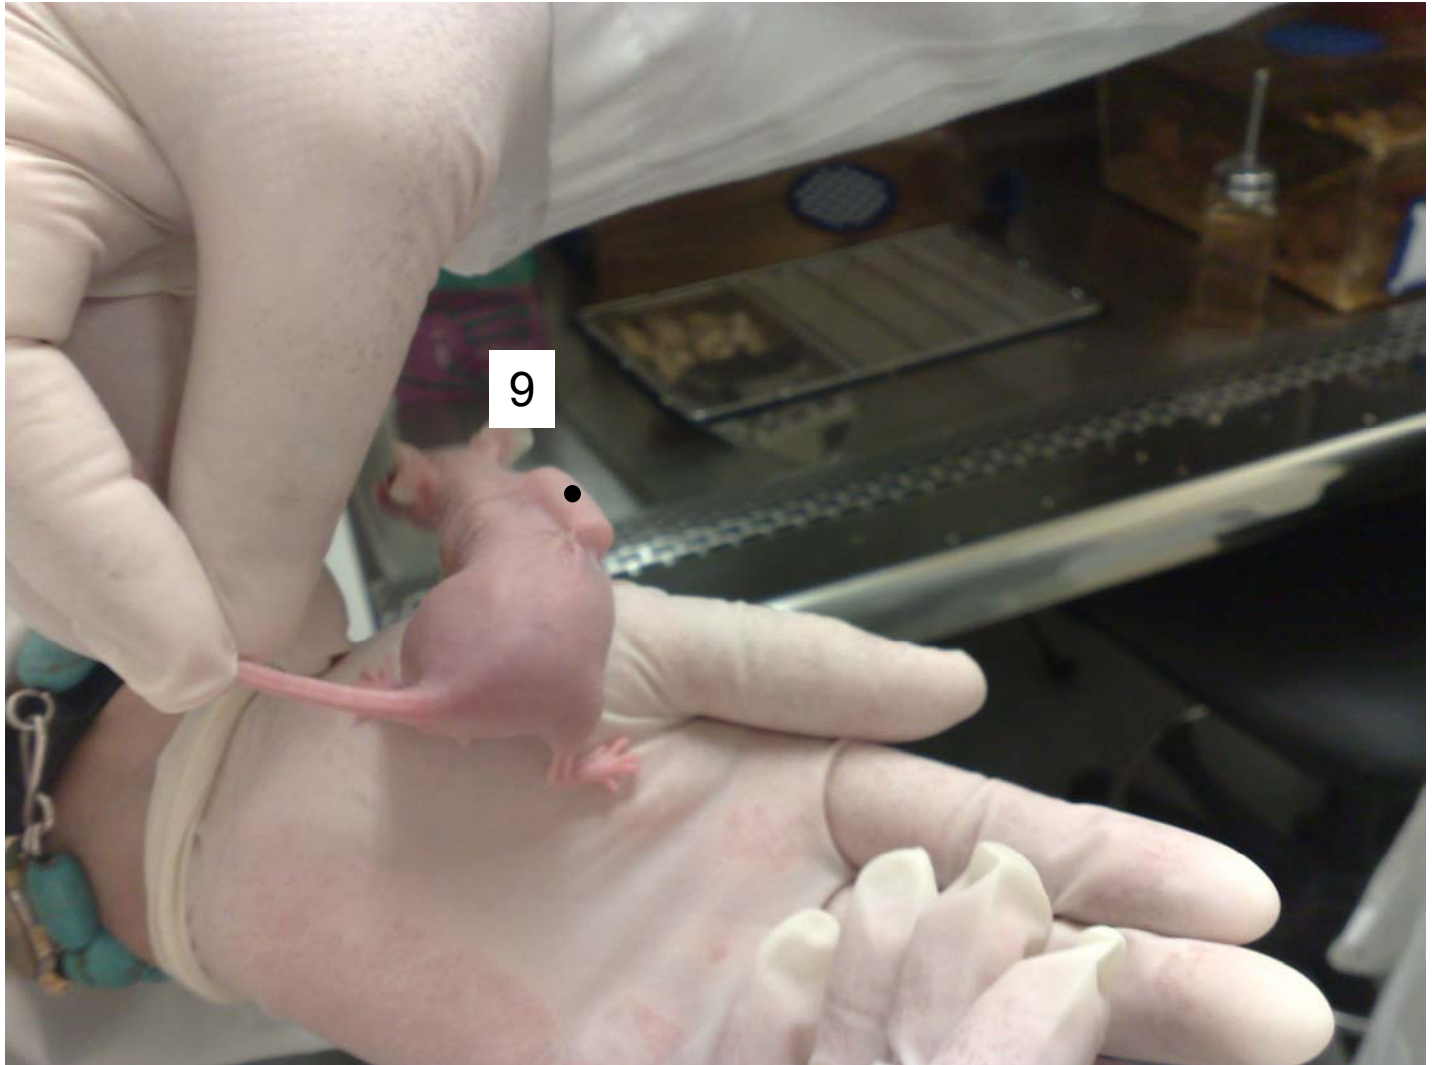

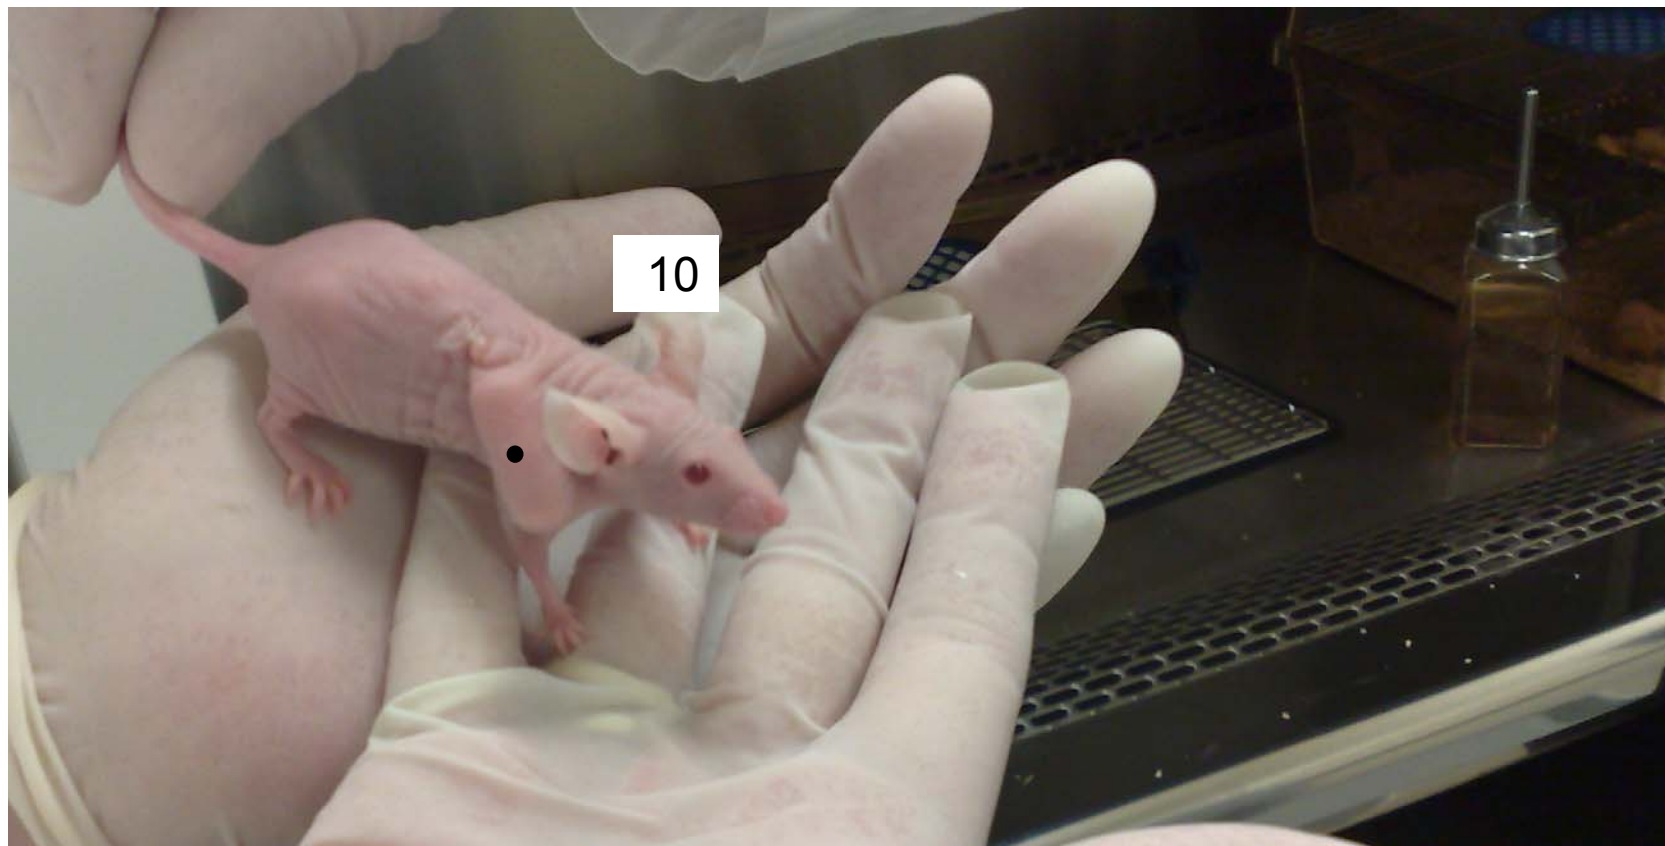

Cont

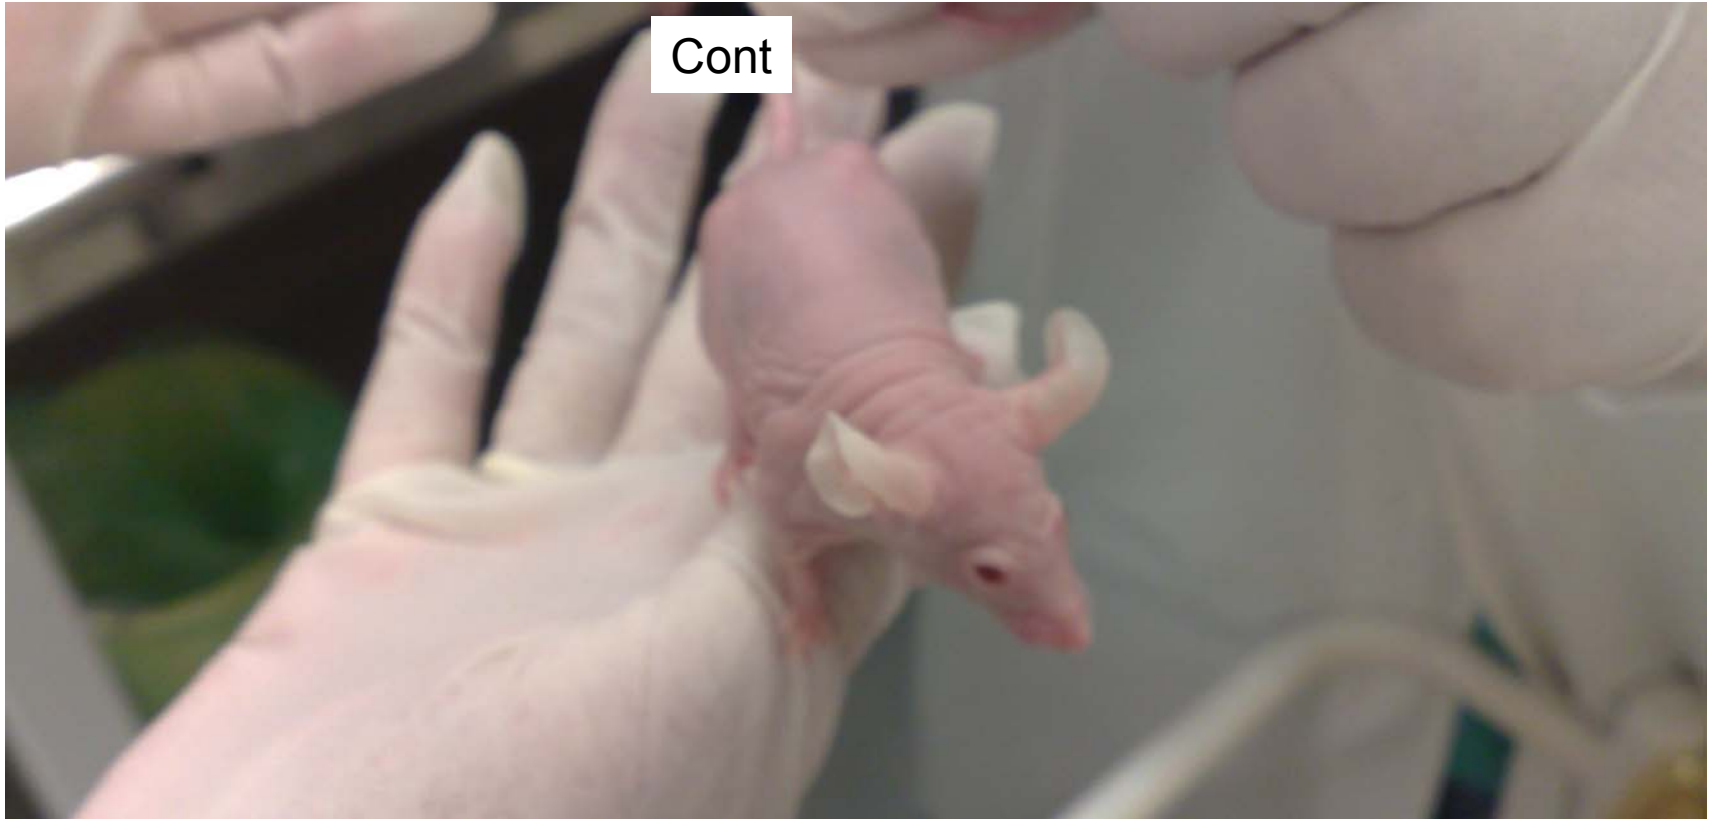



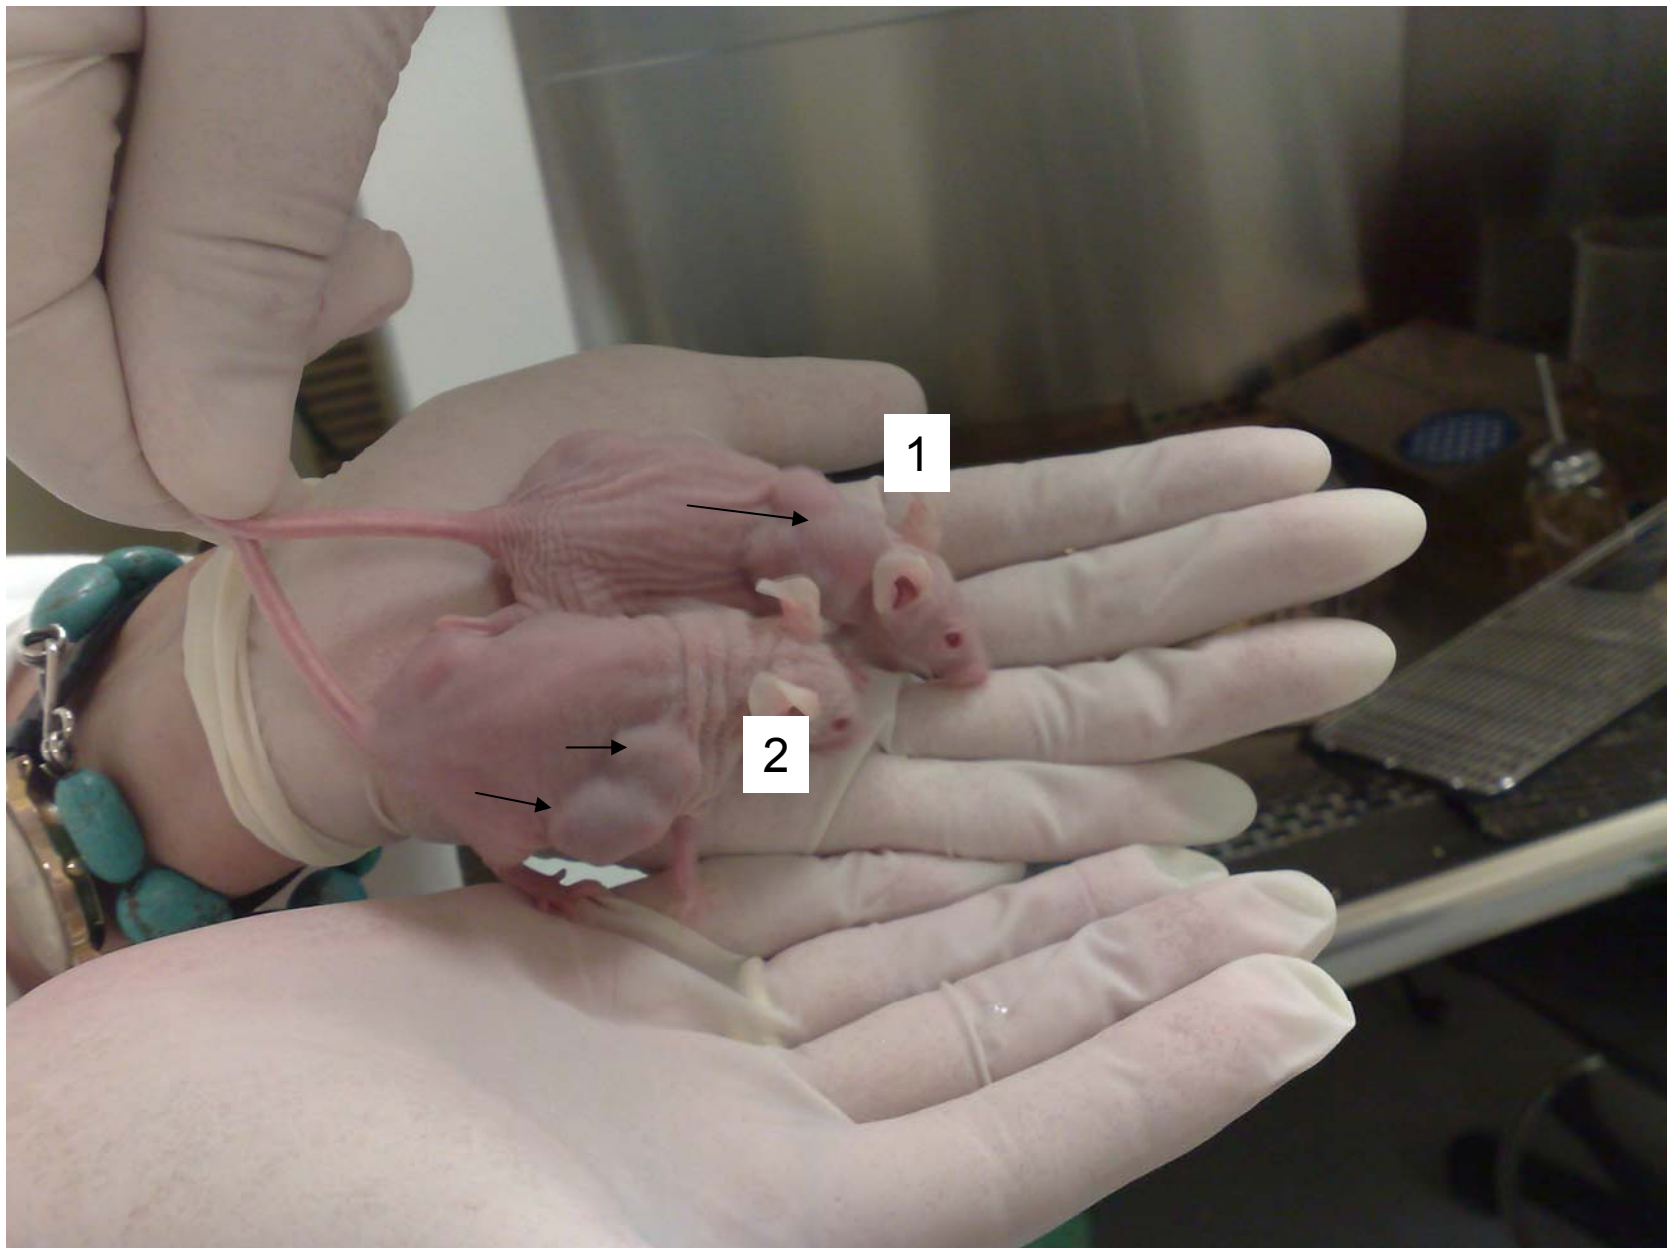

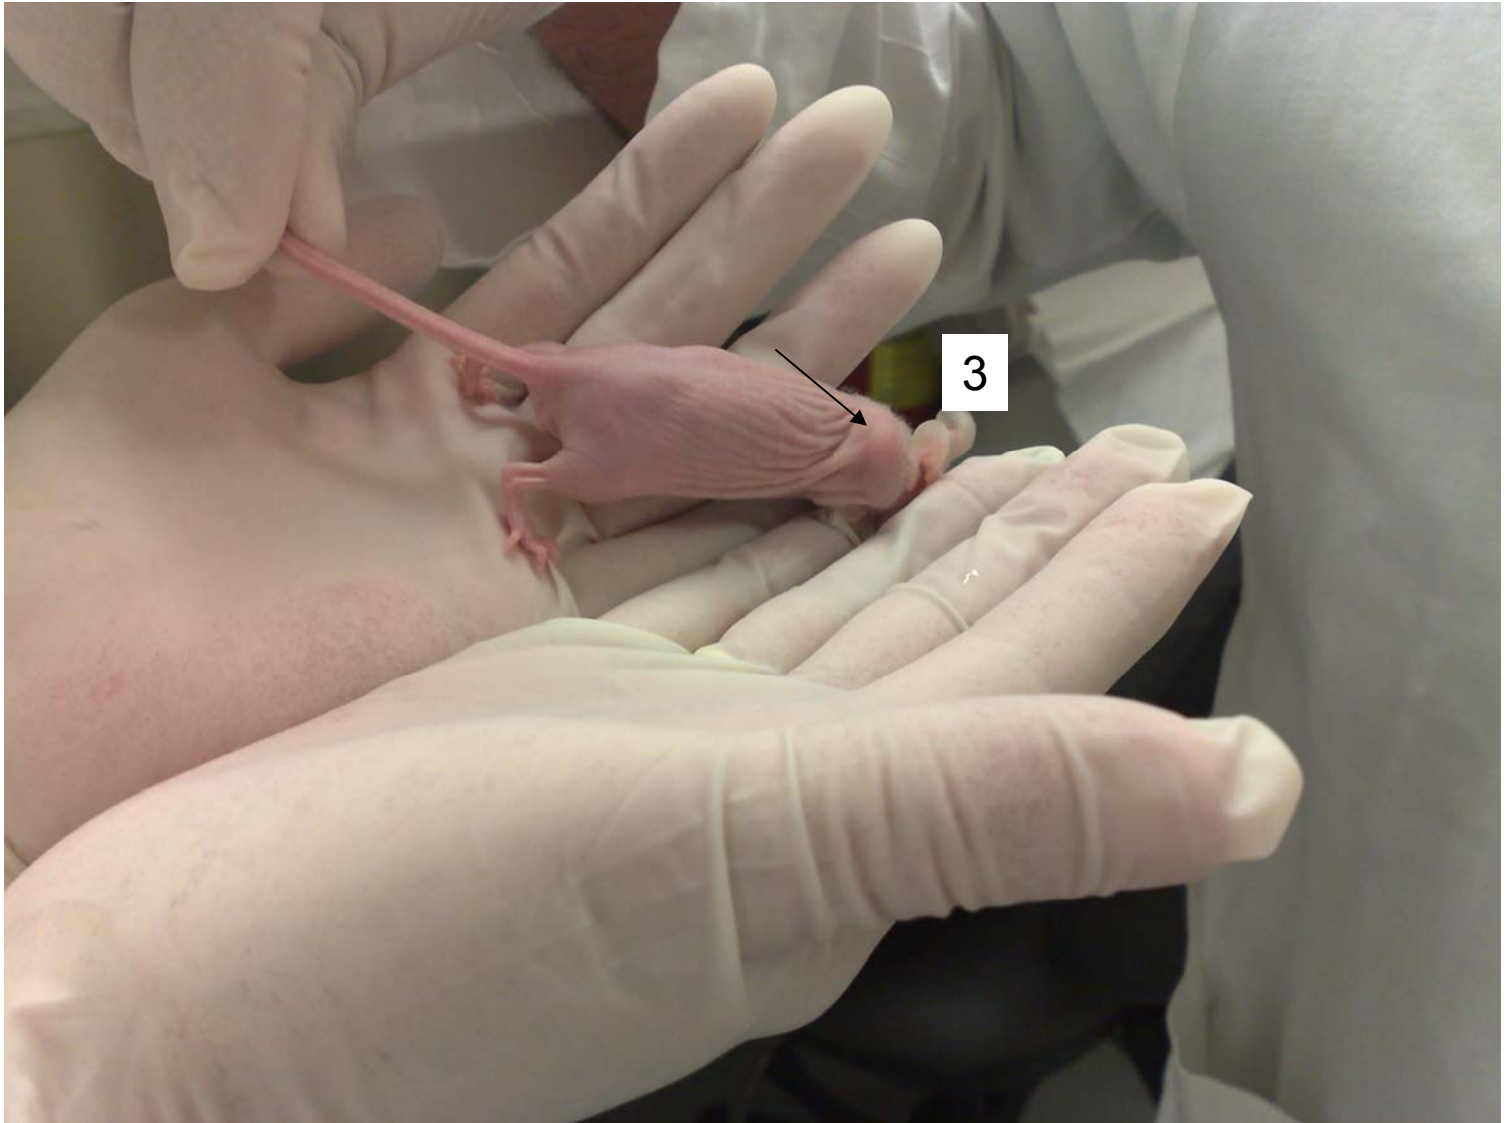

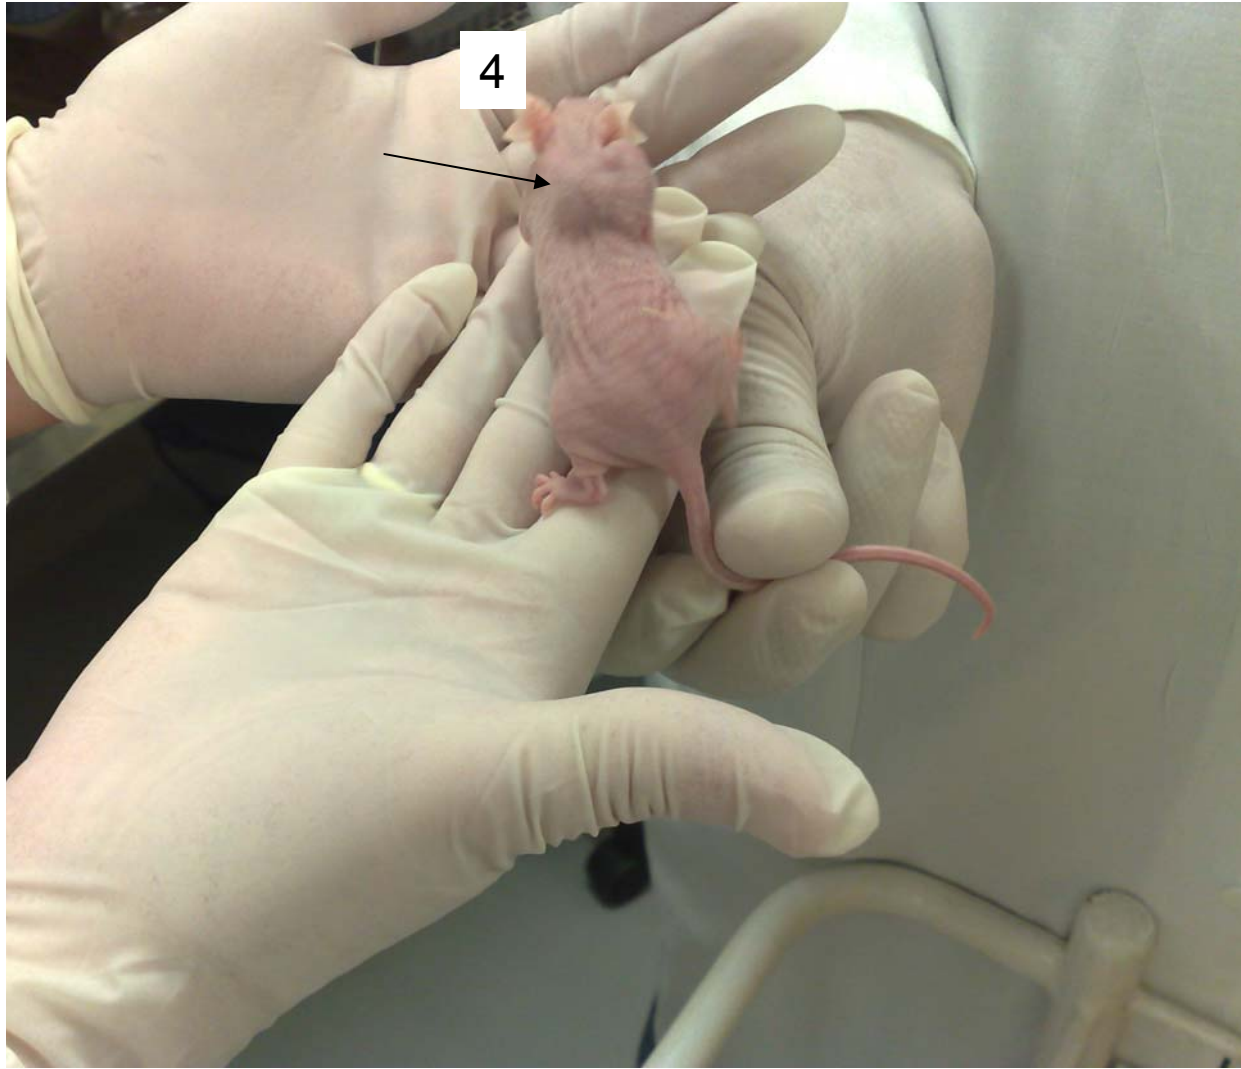

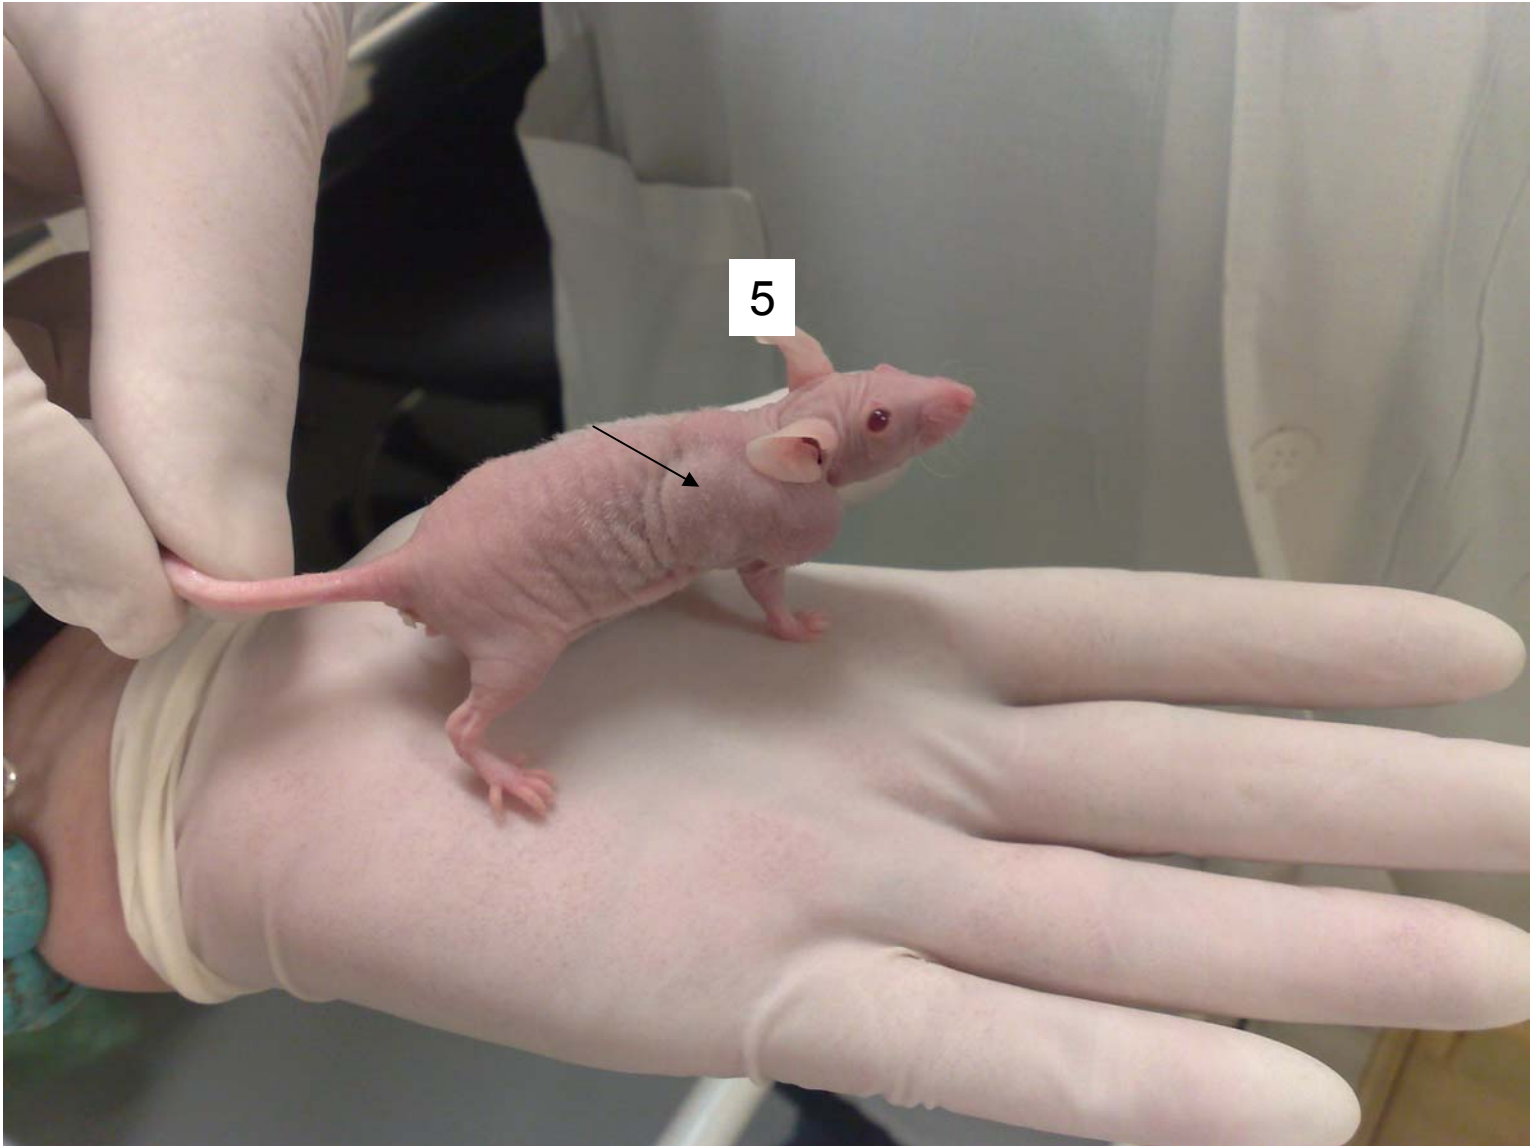

12 days later:

Slides 14-15: tumors developed in the untreated mice (# 1-5). One mouse died on day 22.

The other 4 were photographed and sacrificed.

Slide 16: Mice treated with PJ-34 (# 6-10), 8 days after the treatment ceased. No tumors observed in any of them.

Control: untreated and un-injected mouse

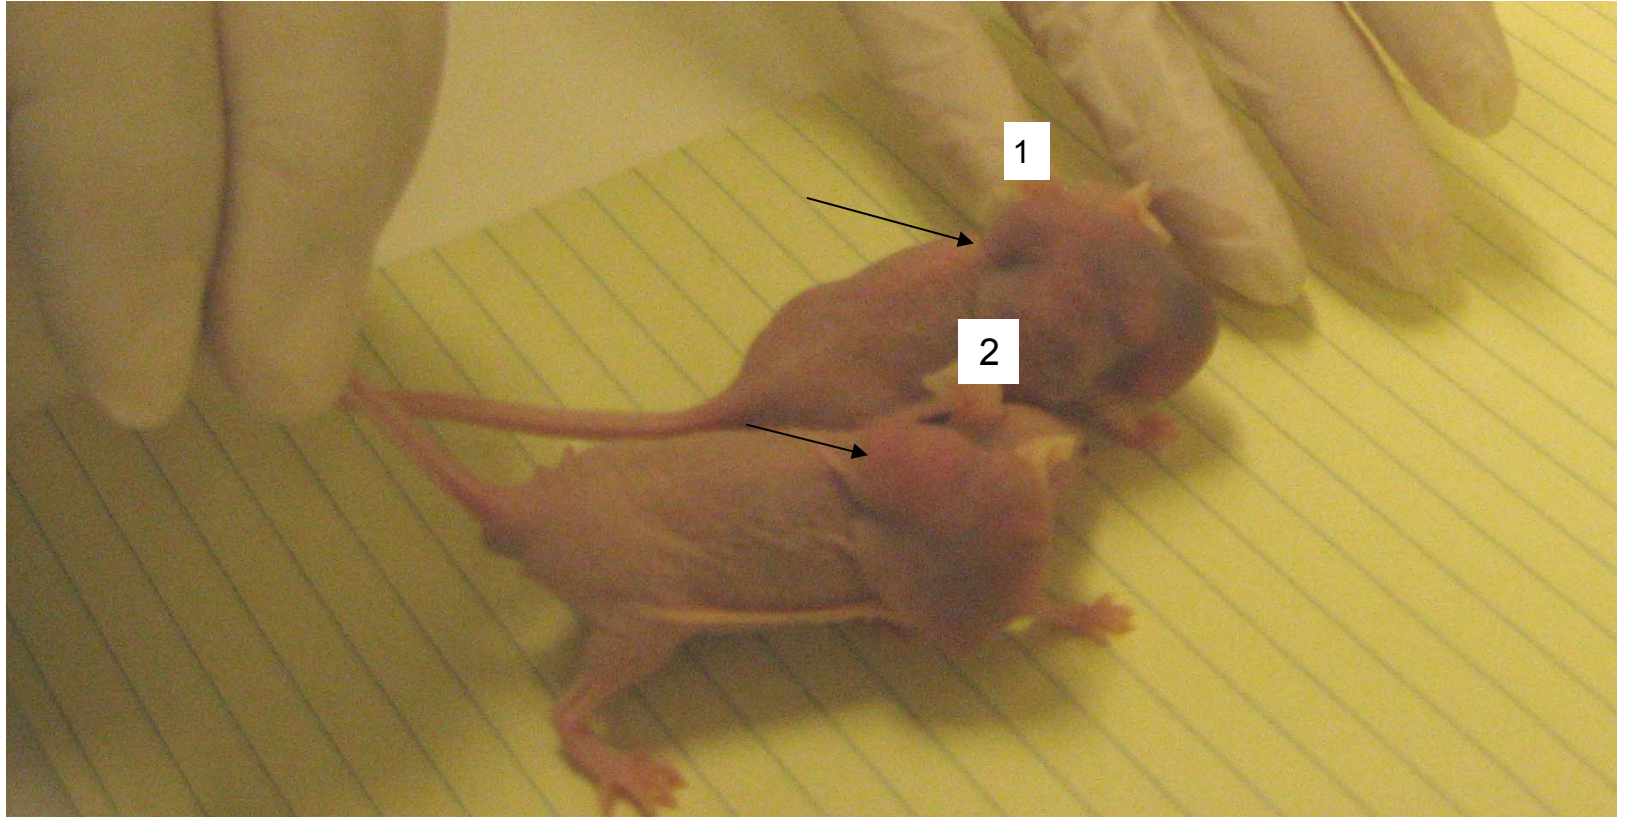

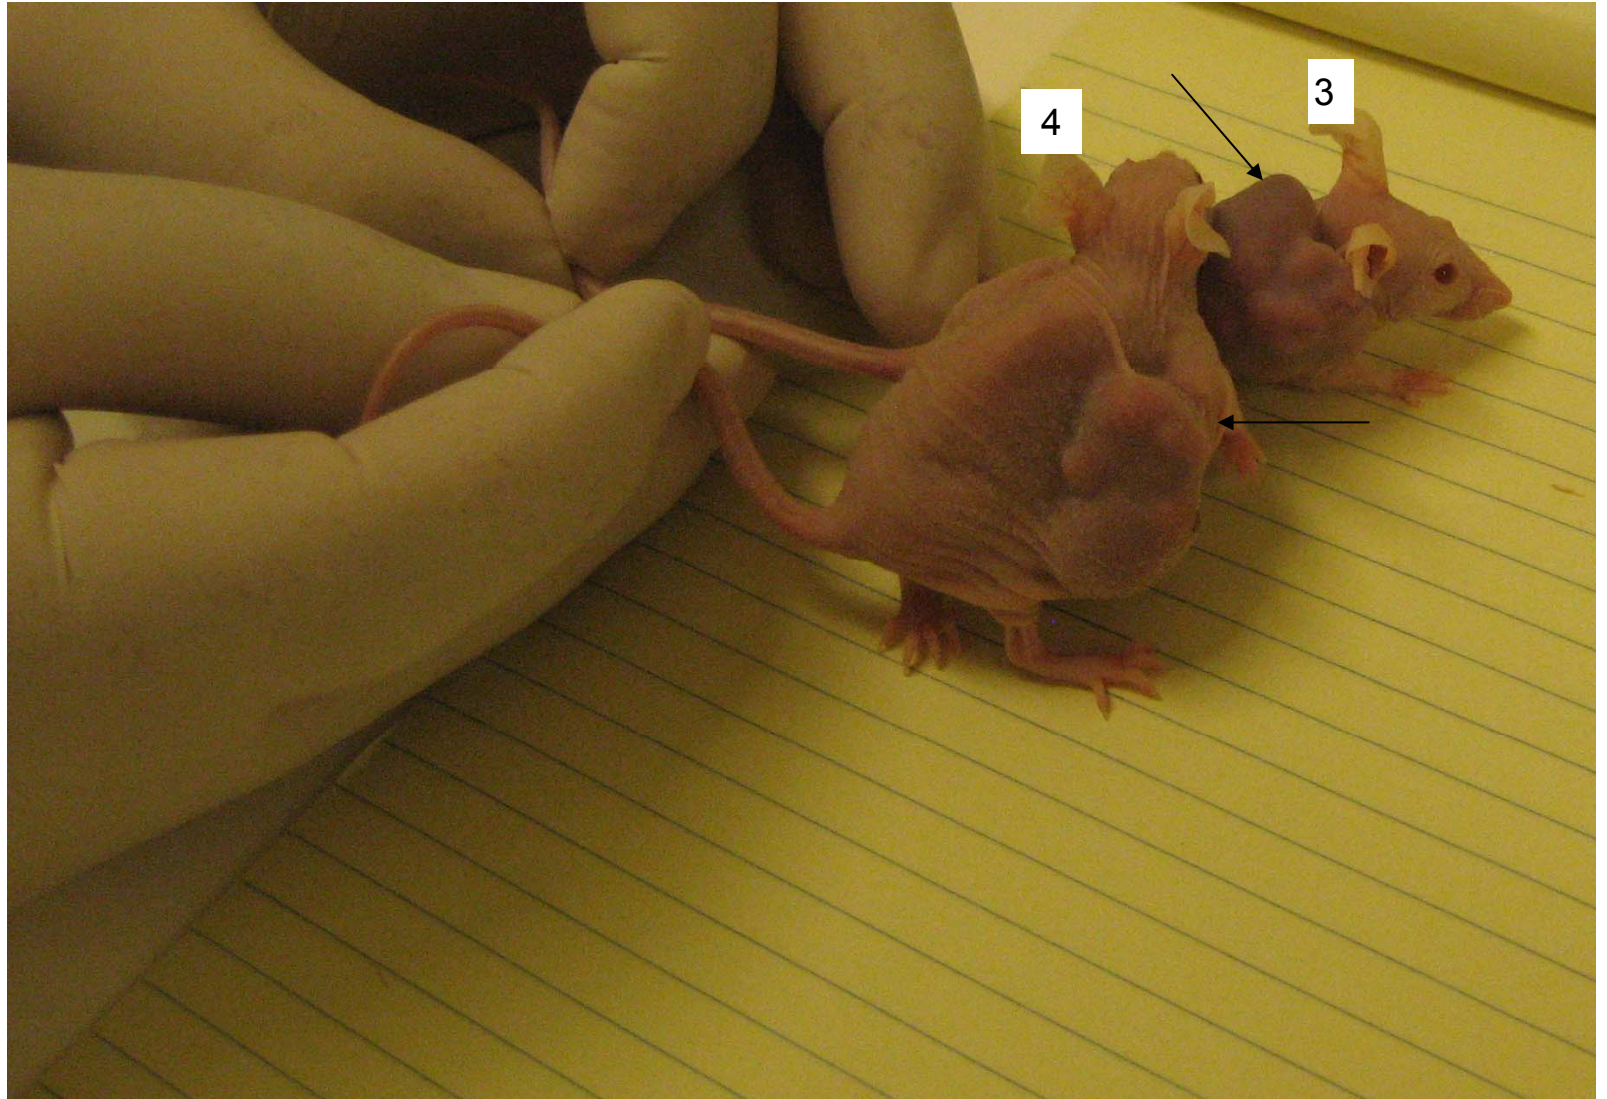

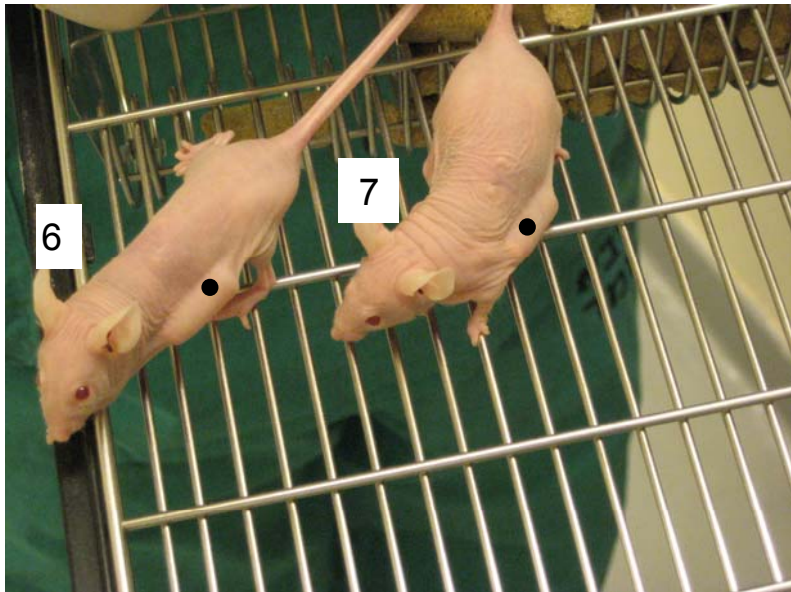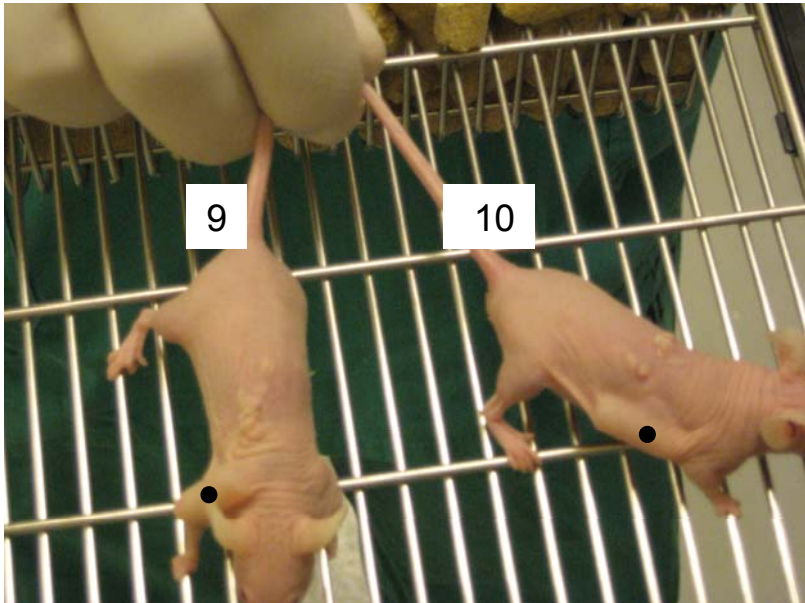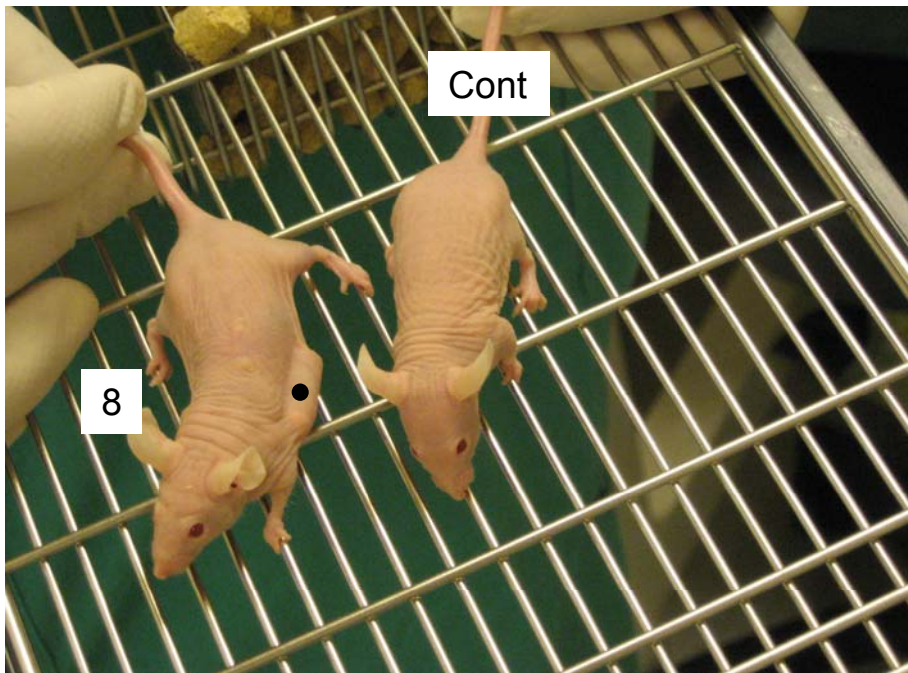

Supplement: bcr2445-S1.pdf [file bcr2445-S1.pdf]
